1        Preventing within household transmission of COVID-19: Is self-  
2                    isolation outside the home feasible and acceptable?

3

4    Dr Sarah Denford<sup>1,2</sup>; Dr Kate Morton<sup>3</sup>; Dr Jeremy Horwood<sup>1</sup>; Rachel de Garang<sup>4</sup>, Professor Lucy  
5    Yardley<sup>1,2,3</sup>

6

7    <sup>1</sup>Population Health Sciences, Bristol Medical School, University of Bristol, Bristol, UK

8    <sup>2</sup>School of Psychological Science, University of Bristol, Bristol, UK

9    <sup>3</sup>Academic Unit of Psychology, University of Southampton, Southampton, UK

10    <sup>4</sup>Public contributor and BME Engagement Worker for the Voice & Influence Partnership at The Care  
11    Forum

12

13    \*Correspondence to:

14    Dr Sarah Denford

15    Population Health Sciences,

16    Bristol Medical School,

17    University of Bristol,

18    Priory Road Complex,

19    Bristol, BS8 1TU

## 20 Abstract

## 21 Background

22 Within-household transmission of COVID-19 is responsible for a significant number of infections.  
23 The risk of within-household infection is greatly increased among those from Black Asian and  
24 minority ethnic (BAME) and low income communities. Efforts to protect these communities are  
25 urgently needed. The aim of this study is to explore the acceptability of provision of accommodation  
26 to support isolation outside the home among at risk populations.

## 27 Methods

28 Our study used a mixed methods design structured in two phases. In phase 1, we conducted a survey  
29 study of a sample of volunteers from our existing database of 300 individuals who had provided  
30 consent to be contacted about ongoing research projects into reducing infection transmission. In phase  
31 2, we conducted semi-structured interviews with 19 participants from BAME communities and low  
32 income communities recruited through social media.

## 33 Results

34 Many participants from both the survey and interview phase of the study viewed the provision of  
35 accommodation to support isolation as both important and necessary to protect the household and  
36 control the virus. Factors influencing likely uptake of accommodation included perceived 1)  
37 vulnerability of household 2) exposure to the virus and 3) options for isolation within the home.  
38 Barriers to isolation outside the home included 1) being able to isolate at home 2) not wanting to be  
39 apart from family 3) caring for others 4) concerns about the implications of isolation for mental  
40 wellbeing 5) upheaval of moving when ill and 6) perceived risk to and from others in the building.  
41 Participants raised a series of issues surrounding the provision of accommodation outside the home  
42 that should be addressed before it could be offered. These included questions regarding who should  
43 use temporary accommodation and at what stage to effectively reduce transmission in the home,  
44 and how infection control in temporary accommodation would be managed. Concerns were also  
45 raised among those with caring duties and responsibilities.

46 Conclusion

47 This research provides evidence that the provision of accommodation to support isolation outside  
48 the home is viewed as acceptable, feasible and necessary by many people who are concerned about  
49 infection transmission in the home. We explore ways in which isolation outside the home might be  
50 offered to suit the needs of people in different circumstances. In particular, vulnerable members of the  
51 household could be protected if accommodation is offered to individuals who are informed through  
52 test trace and isolate that they have been in contact with the virus.

53 Key words: COVID-19; self-isolation; BAME communities; infection control; participatory research

## 54 Introduction

55 Human behaviour is central to the transmission of COVID-19. To reduce transmission in the absence  
56 of pharmaceutical interventions, a series of behavioural interventions have been suggested and  
57 implemented (1). Whilst the introduction of social distancing behaviours can reduce the spread of  
58 COVID-19 within the community (2), people with symptoms of the virus are instructed to remain in  
59 the home; potentially with cohabiting families and friends. This has led to clusters of infection within  
60 households (3), and within household transmission being highlighted as a dominant route of infection  
61 (4, 5). In order to avoid within household transmission of COVID-19, excellent infection control  
62 measures are needed (4). This includes introducing hygiene protocols, appropriate use of personal  
63 protective equipment (e.g., face mask use when necessary), and within household distancing and  
64 segregation – or ‘self-isolation’ - of infected individuals (5-7). Although effective for reducing within  
65 household transmission (2, 8), there is substantial variation in the extent to which the public are able  
66 and willing to adhere to these behavioural solutions (9-11).

67 There is little doubt that COVID-19 is exposing and widening existing inequalities within society.  
68 Data have shown that those from Black, Asian, and minority ethnic (BAME) communities have a  
69 markedly higher risk of infection (12, 13) and worse clinical outcomes, including intensive therapy  
70 unit (ITU) admission and mortality (14, 15). Likewise, those living in the most deprived areas are  
71 more likely to be diagnosed with COVID-19, and have worse outcomes than those living in the least  
72 deprived areas (15). The reasons underpinning the disproportionate impact of the virus on these  
73 populations are multiple and complex, but include increased risk of occupational and geographical  
74 exposure (12, 15-17) paired with reduced opportunities for social distancing and self-isolation (9).  
75 Indeed, a recent survey highlighted that the ability to self-isolate was lowest among low income  
76 households and those from BAME communities (9). People from these communities were also  
77 considerably less likely to be able to work remotely. Innovative solutions to prevent the spread of the  
78 virus within BAME and low income group households are therefore urgently required.

79 One potential solution to preventing the transmission of the virus within the home is self-isolation  
80 outside the home. Centralised – as opposed to individual - isolation has been suggested (3) and

81 implemented successfully in locations such as China and Korea (18). In Wuhan, for example, existing  
82 public venues were rapidly converted into what are termed ‘Fangcang shelter hospitals’. Individuals  
83 with symptoms of COVID-19 would isolate within these shelters, away from friends and family. In  
84 addition to providing food and medical care, these locations ensured adherence to isolation guidance,  
85 keeping the families and household members of the infected individual safe from infection, and  
86 provided social engagement, reducing psychological distress associated with self-isolation (19).  
87 Indeed, a key difference between Fangcang shelters and makeshift or emergency hospitals is the  
88 social space provided, allowing residents to engage and socialise with others during the self-isolation  
89 period (19). However, although cost effective and acceptable to residents living in Wuhan, the  
90 substantial differences in culture and living conditions mean that Fangcang style accommodation may  
91 be less likely to be accepted by individuals in many European countries.

92 A small number of European countries have however, converted some hotels, hostels, dormitories or  
93 specialised facilities into special isolation facilities to accommodate people (20). In the United  
94 Kingdom, National Health Service (NHS) workers were offered, on a voluntary basis, the option of  
95 staying in NHS reimbursed hotel accommodation to enable them to continue to work if they were  
96 living with others who may be vulnerable. This strategy has not been widely implemented, and most  
97 of Europe and the United States continue to encourage individuals to self-isolate within the home.  
98 For those who can afford it, self-funded luxury hotel “quarantine packages” are available (21-23), but,  
99 funded accommodation has not yet been offered in the UK to individuals or communities outside the  
100 NHS, who may be at risk.

101 Whilst the offer of funded accommodation within which to self-isolate is a potentially viable strategy,  
102 it is critical that options for self-isolation are culturally appropriate and acceptable to the communities  
103 that they serve to protect. This requires extensive input from target users to understand the  
104 environmental and cultural context within which the intervention could be introduced, as well as the  
105 psychological and social factors likely to influence uptake (9).

106 The aim of this research is therefore to understand whether or not offers of self-isolation  
107 accommodation would be acceptable and feasible for people concerned about reducing infection

108 transmission in the home, and among BAME and low income communities, and to elicit discussions  
109 regarding what we can do to improve advice and approaches to self-isolation.

## 110 **Methods**

### 111 **Study design**

112 Our study used a mixed methods design structured in two phases. In phase 1, we conducted a survey  
113 study of a sample of volunteers from our existing database of 300 individuals who had been recruited  
114 through their engagement with Germ Defence, a website aiming to reduce infection risks in the home  
115 (Supplement 1). These individuals had provided consent to be contacted about ongoing research  
116 projects. In phase 2, we conducted semi-structured interviews with 19 participants from BAME and  
117 low income communities. These interviews were designed to help us explore further concepts  
118 identified in phase 1, and to elicit discussions regarding how isolation outside the home could best be  
119 utilised.

### 120 **Phase 1**

#### 121 **Data collection**

122 A convenience sample of volunteers who had previously provided consent to be contacted and invited  
123 to take part in research were recruited via email distribution lists. Participants were invited to  
124 complete a confidential online survey regarding their ability and willingness to self-isolate within the  
125 home, and the acceptability of accommodation to self-isolate outside the home. Informed consent was  
126 collected online before starting the survey.

#### 127 **Data analysis**

128 Frequencies and descriptive statistics are presented for closed survey questions. Free text answers  
129 were used to offer further insight into, and explanations for, answers given to closed survey questions.  
130 We identified barriers and facilitators related to the provision of accommodation with qualitative  
131 content analysis in three stages (24, 25). First, responses to the survey were coded by two authors  
132 independently. During stage two, codes were categorised into a unique list of barriers and facilitators,  
133 which were discussed and refined by the same two authors. Data were then assigned to each category,  
134 and counts of text assigned to each category were generated.

## 135 Phase 2

### 136 Data collection

137 Volunteers from BAME and low income communities were recruited via existing contacts with  
138 community groups, social media advertisements, and snowball sampling. Interested individuals  
139 responded to an invitation take part in research to understand experiences and interpretations of self-  
140 isolation and protection during the pandemic. Participants were over the age of 18 years and residing  
141 in the UK. We purposely sampled for diversity in key factors, including ethnicity, living  
142 arrangements, occupation, and vulnerability. Sample size was informed by the concept of  
143 ‘information power’, (26) with analysis and sampling conducted in parallel and continuous  
144 assessment of the suitability of the information within the sample with regard to study objectives.  
145 Potential participants contacting the research team were provided with a study information sheet and  
146 given an opportunity to ask any questions. Participants were informed of the voluntary nature of  
147 participation in the study, and assured of the confidentiality of the data collected. As all interviews  
148 were conducted via the telephone or online, audio recorded (rather than written) verbal consent was  
149 obtained.

150 The semi-structured topic guide (Supplement 2) was informed by data collected during phase 1 as  
151 well as existing literature, and conversations with experts in public health, behaviour change and  
152 intervention development. Questions were designed to explore participants’ current living situation,  
153 their experiences of self-isolation within the home, perceptions relating to self-isolation outside the  
154 home, and suggestions regarding how self-isolation outside the home may be used and facilitated.  
155 Interviews lasted between 21 and 55 minutes (mean duration 38 minutes).

### 156 Analysis

157 Data from the interviews were analysed using a thematic approach aimed at identifying issues raised  
158 by the participants and ways in which these issues may be mitigated (27). Following the stages of  
159 thematic analysis, two researchers independently read transcripts to assign codes to the data and  
160 identify possible themes. These themes were discussed and refined through discussion. An initial  
161 framework was developed, checked against the data, and refined as necessary. Charts were developed

162 for each theme in the framework, and relevant text from the transcripts were be copied or summarised  
163 under each theme in the chart. Charts were then used to compare data within and between individuals.  
164 Participants were invited to discuss the analysis and interpretations with the researchers via skype or  
165 email.

## 166 Results

### 167 Phase 1

168 A total of 110 respondents completed the survey (Table 1). Of all respondents, 24 (22%) stated that  
169 they would accept an offer of accommodation if it was available, 25 (22%) said that they would  
170 probably accept, 21 (19%) said they would probably not accept and 39 (35%) said that they would not  
171 accept. Of the 85 (77%) participants who said they were not able to isolate at home, 24 (28%) said  
172 they would accept, 23 (27%) said that they would probably accept, 18 (21%) said that they would  
173 probably not accept, and 16 (18%) said they would not accept. Of those unable to isolate at home, and  
174 who also considered themselves to be of high risk if they catch the virus (N = 36) or living with  
175 someone who is high risk (N 18), a total of 19 (35%) said that they would accept, 12 (22%) would  
176 probably accept, 14 (26%) would probably not accept, and 8 (14%) would not accept.

177 Three factors were coded as facilitators influencing decisions to accept an offer of accommodation to  
178 support self-isolation (Table 2). These were to protect others within the household, to control the  
179 virus, and to avoid using shared spaces. Seven barriers to accepting the offer of accommodation  
180 included 1) the ability to isolate within the home, 2) not wanting to be apart from family 3) having  
181 caring responsibilities (4) concerns about the impact of isolation on mental wellbeing and  
182 relationships (5) concerns about the upheaval of moving when ill, (6) perceived risk of catching or  
183 spreading coronavirus if leaving the building, and (7) unfeasible for unspecified reasons (Table 2).

### 184 Phase 2

185 A total of 19 participants took part in the interviews from Black African (N=2), Black British (N=1),  
186 Mixed White / Black Caribbean (N=1) Indian (N=5), British Indian (N=2) Asian (N=1) British Asian  
187 Pakistani (N=1) and White (N=6) ethnic groups (Table 1). Only two participants reported that they  
188 would be unlikely to accept the offer of accommodation outside the home. Six participants said that



189 they would accept as a last resort, four said that they would have accepted the offer had it been  
190 needed, and six participants said that they would be likely to accept. One participant had moved a  
191 family member out of the home for 11 weeks during the pandemic.

## 192 Protecting the household

193 Participants were positive about the idea of accommodation being offered to support isolation outside  
194 the home. It was considered to be a highly effective way of preventing the spread of the virus among  
195 those who were unable to isolate within their current homes.

196 *“If I was offered accommodation which meant that my family were kept safe, then absolutely I would,  
197 I would welcome it” (Participant 14, White, female).*

198 Critically, participants thought that it had the potential to save lives:

199 *“Wow that would probably have saved a lot of lives actually. Yeah” (Participant 03, British Asian  
200 Pakistani, male).*

## 201 Risk

202 The decision to accept, or not, the offer of accommodation appeared to be influenced by how at risk  
203 the person considered themselves or their household to be. Perceived risk was influenced by how  
204 vulnerable the participant (or their household) were perceived to be, level of exposure to the virus,  
205 and level of contact with household members.

## 206 Vulnerability

207 Eight participants considered themselves or a member of their household to be vulnerable, and this  
208 was strongly influential in the decision to isolate both within and outside the home. One participant,  
209 whose husband had moved out of family home for 11 weeks over the pandemic, explained how  
210 keeping her vulnerable daughter safe was their main priority:

211 *“It’s just something that has to be done, you know, and he actually didn’t come back inside the house,  
212 he left for work that morning and then didn’t come back for 11 weeks. His bags were packed, his bags  
213 were packed and the hotel was booked by the evening and gone” (Participant 18, White, female).*

214 Participants who did not consider themselves (or their household) to be vulnerable reported that they  
215 would be more willing to accept the offer of accommodation outside the home if they or their family  
216 were vulnerable:

217 *“Yeah maybe if I had my older relatives with me, or I had somebody who um, you know had any*  
218 *underlying health condition, probably yeah I would have offered to go out, but in the current situation*  
219 *I wouldn’t have, so. If I had somebody who was living with me who was over 65 years old or who had*  
220 *heart disease or was diabetic, I would offered to go out yes of the house” (Participant 06, Indian,*  
221 *female).*

222 Due to the severity of the virus, any one could consider themselves to be vulnerable, regardless of age  
223 and health status:

224 *“I even read on the net or so, I’m not sure if this information is credible or not, but still what I saw on*  
225 *the net is even if you get the virus even if you recover from it, it can have detrimental consequences on*  
226 *your health. For example I read somewhere on the net I read that if you have the virus it can damage*  
227 *your lungs, like, forever, it can have impact on your lungs forever, so this bit of information is quite*  
228 *scary” (Participant 07, Indian, female).*

## 229 Exposure to the virus

230 Accommodation was considered to be particularly important for those who are in situations in which  
231 there is potential for high exposure to the virus. There was wide understanding that those from BAME  
232 and low income communities were more likely to be in situations in which exposure to the virus is  
233 probable:

234 *“Lots of people of colour, and not just, Bangladeshi etcetera, who work in jobs where they have no*  
235 *choice but to go in. You know, if someone said isolate, they would say ‘well how will I feed my*  
236 *family?’ They have to go in. So they’re in jobs where they have to go in, they have to mix with the*  
237 *public” (Participant 11, Black African, female).*

238 Participants even described situations in which people from BAME communities were asked to leave  
239 accommodation due to increased exposure to the virus:

240 *“When he got back [from work] the door locks were changed and she [the landlady] said ‘I’m really*  
241 *sorry but I can’t have you in here because I’m too frightened, you’re a cab driver, you’re seeing all*  
242 *these people you’re going to infect the whole house you know, I’m sorry I can’t have you in here”*  
243 *(Participant 11, Black African, female).*

244 Whilst recognising the value of accommodation, those who were not exposed to the virus thought that  
245 accommodation would be unnecessary for their household:

246 *“If I’m not taking the precaution for example, if I have to go to work, then yeah I would suggest for*  
247 *him to isolate somewhere else because I might have the virus in transfer it to him, so yeah. But my*  
248 *case is different because I work from home and I’m not going out and I’m not meeting people, so*  
249 *yeah. There would be no point for him to self-isolate somewhere else when I’m not going out”*  
250 *(Participant 07, Indian, female).*

#### 251 Contact with household members

252 Accommodation was viewed as being important for those who are unable to isolate from their  
253 household due to the size of the house and / or the size of the household. Participants described how  
254 they would be willing to move out of the home as the amount of shared space would make isolation  
255 within the home difficult:

256 *“Well personally, I wouldn’t have been any choice, I think it’s the best way to prevent either him or*  
257 *me from getting the virus because living in the same house, it would be, uh the risk would be very high*  
258 *because we are sharing the same bathroom, the same kitchen, uh you know, so it would be very*  
259 *difficult” (Participant 07, Indian, female).*

260 Among BAME communities in particular, this was considered to be a substantial problem as many  
261 within the community would live in multigenerational households:

262 *“That idea was a very good idea. I mean in [home town] there are areas where you have three*  
263 *generations living in a terraced house, grandparents, parents and the children yeah. Okay yeah now*  
264 *the reason why there is such a high rate of the virus here in [home town] is because of the housing*  
265 *here. Yeah outdated housing, and you know, because the family unit is very good, they look after each*  
266 *other, but because of COVID it’s come back to haunt us big time” (Participant 12, Asian, male).*

267 However, even those who had sufficient space for isolation highlighted difficulties in containing the  
268 virus and preventing the spread of viruses within the household:

269 *“I think personally that’s a really really good idea. Because going back to what I was saying about*  
270 *infection control I know how hard it must be to limit exposure if one of you’s got a virus, not just*  
271 *COVID, but any virus” (Participant 14, White, female).*

## 272 Key concerns

273 Participants raised a series of issues and concerns surrounding the provision of accommodation  
274 outside the home that should be addressed before such a scheme could be offered. Participants were  
275 keen to understand who should use temporary accommodation, at what stage, and for how long.  
276 Concerns were also raised among those with caring duties and responsibilities, and questions were  
277 asked regarding who would fund the scheme.

## 278 Timing and duration

279 Participants wanted clarification regarding the stage at which people should move into temporary  
280 accommodation, and for how long. Participants were concerned that it would be too late to move out  
281 of the home once symptoms had presented.

282 *“It’s, the, to me, because all the guidance and information that we’ve had is that you’re contagious*  
283 *before you start showing symptoms, I wouldn’t want to, because in my opinion if that is all true, you*  
284 *would already been exposed to it, he’d have already had it or already have it, um it just it feels like*  
285 *that would be too late” (Participant 15, White, female).*

286 Despite concerns about leaving it too late, participants were not willing to isolate for long and  
287 unspecified periods of time:

288 *“I will be very very reluctant to go and live somewhere else. If it’s for about a week or something I*  
289 *don’t mind, but uh, but still yes it’s just a matter of change because we have always lived in our*  
290 *houses, so to go out and live somewhere else it’s quite a bit of a change” (Participant 13, Indian,*  
291 *male).*

292 In the case of the extremely clinically vulnerable, the duration was deemed necessary to protect the  
293 family:

294 “You’ve just got to get through it, and it was only like, well it could have been 12 weeks, but in a  
295 lifetime it’s not that long, really” (Participant 18, White, female).

296 Who should use temporary accommodation

297 Participants raised questions about whether the intention would be for symptomatic persons or  
298 vulnerable persons to leave the home for temporary accommodation. Concerns were expressed  
299 regarding the potential of infected individuals to spread the virus should they leave the home to stay,  
300 for example, with a family member:

301 “I think I would probably self-isolate too at my own house, rather than, because I might already have  
302 symptoms unknowingly, and then if I go to another household I might spread it to say, like my mum,  
303 so I think I would actually stay put” (Participant 02, Mixed White/ Black Caribbean, female).

304 In addition, concerns were also raised regarding the potential for those who are not infected to catch  
305 the virus in temporary accommodation:

306 “Again I would kind of feel I would be safer at home... You go into somewhere else that I couldn’t  
307 guarantee would be as clean as I would you know, me cleaning it” (Participant 17, White, female).

308 Participants suggested schemes in which exposed workers were asked to isolate as a preventative  
309 measure, thus saving infection from entering the household in the first place:

310 “I think almost, you’re better offering it to the workers who might go back, so like, a lot of people still  
311 worked throughout, where they couldn’t, so actually, were they the ones taking it back into their own  
312 homes, so actually would it be better targeting the workers and saying right if this happens again, if  
313 you are a key worker and you’ve got people at home, then you go to the hotel, like the NHS staff did,  
314 rather than let’s have it for people who are sick” (Participant 19, White, male).

315 For healthy individuals moving out to protect vulnerable residents, the ability to continue to work was  
316 important, and accommodation with internet access and / or within commuting distance of their work  
317 site would be necessary:

318 “You know, if you were the person who was COVID free and leaving your family in the house, I don’t  
319 know which way round you suggest because if I was COVID free I’d still want to work, so it would  
320 have to be close to work” (Participant 14, White, female).

321 *“If it was me going to self-isolate, for example, um, and I work from home you know, I would want,*  
322 *you know, I would like to be able to still have my internet and be able to carry on with my work”*  
323 *(Participant 01, Black African, female).*

324 Caring responsibilities

325 Among those who had caring responsibilities or were dependent on others, concerns were raised as to  
326 who would care for the family in their absence:

327 *“Um, it would be hard and difficult because you’re used to living with each other you’re reliant on*  
328 *each other as a family, you know, I do the shopping for the house most of the time so you know,*  
329 *cooking and things like that, so if I wasn’t there, or my husband wasn’t there, you know, because of*  
330 *the kids and all that” (Participant 04, Black British, female).*

331 Participants described defined roles and responsibilities for each household member, and removal of  
332 key persons was viewed as problematic:

333 *I’m just wondering now what would have happened if she [participant’s wife] had the COVID 19,*  
334 *because she is the main person who drives the house, because she does the cooking and looks after my*  
335 *mum, so if she was made to go out and live somewhere else then my mum would have problems, we*  
336 *would have problems” (Participant 13, Indian, male).*

337 Among BAME communities in particular, the need and desire to care for family members was a  
338 considerable cause for concern. Allowing others to care for their relatives was something that was  
339 only to be considered as a last resort:

340 *“I wouldn’t like to move out from my house, but if it is really essential then I would move, but I would*  
341 *try to fight it off (laughs) yeah, and I guess uh, if it happened to my mum then my mum would be the*  
342 *same, she wouldn’t like to live elsewhere, this was her home for the last 40 years. So because, with*  
343 *Indians we are very close knitted families, we tend to stick by each other, so to her it would probably*  
344 *do more damage going away from us than uh, and then uh, yes, than living not here” (Participant 13,*  
345 *Indian, male).*

346 Concerns were raised about having to leave vulnerable members, potentially putting them at increased  
347 risk of exposure to the virus:

348 *“If I worked within the NHS and I was a key worker in that respect then possibly, but I still think just*  
349 *would be very difficult for me to leave the family home because of [son’s name] and again, husband*  
350 *and his medical condition, because he wouldn’t be able to look after my son, our son the way I would*  
351 *like, picking up food and medication and what not, and then he’d have to, if I wasn’t there he’d have*  
352 *to take the lift and sort of opening up more risk to, he’d be more in contact with people too, so I would*  
353 *say no in that respect” (Participant 17, White, female).*

354 However, there was recognition that despite best efforts carers may contract the virus and participants  
355 had started to make tentative plans for how they would cope should this happen:

356 *“But that was constantly at the back of my mind like, I am going to the shops and say if I caught the*  
357 *virus on the handle of a trolley and then I touch my nose or my eyes and I have caught the virus now*  
358 *and will I have to relocate or move to my bothers house and who would care for my mother? And*  
359 *these were all questions at the back of my mind, but I do know my house is a 4 bedroom house and I*  
360 *could have self-isolate in another room and not put my mother to more risk or more harm... I would*  
361 *go into a separate room in the house and then sleep in the bed and then ideally move, um, not have*  
362 *any contact at all with my mother in the house and call my brother and ask him to intervene”*

363 *(Participant 05, British Indian, male).*

#### 364 Social and emotional support

365 Despite recognising the value and need for accommodation outside the home, participants struggled  
366 with the idea of having to leave the family and home:

367 *“If you’re forced to stay at home at least you have all of your belongings, all things that bring you*  
368 *comfort and people around you. But if you’re in a hotel room by yourself with just the TV and yeah, I*  
369 *would be so bored I think. Probably very anxious as well and quite upset. I’m such an over thinker as*  
370 *well so I would just be overthinking everything. But also at the same time if it meant that my partner*  
371 *doesn’t catch it, then I think that’s probably the main thing on my mind, if it’s temporarily a solution*  
372 *and hopefully that would stop the spread so I would try to look at the positive side of things, but if it*  
373 *was more than two weeks then yeah I really don’t know how I would deal with that” (Participant 02,*  
374 *Mixed White/ Black Caribbean).*

375 It was thought that it would be emotionally challenging to be in isolation in unfamiliar surroundings:  
376 *“I think that would be quite scary like having to do, like I mean I can’t imagine having to do this*  
377 *entire lockdown period by myself, like, obviously I would have to manage but there would have been a*  
378 *lot of different struggles with that kind of thing and I know people who have done it have been lonely*  
379 *and it would have taken a while to adapt, it would be really difficult” (Participant 10, Asian British,*  
380 *female).*

381 Participants highlighted the need for facilities to enable them to continue to communicate with their  
382 friends and family throughout:

383 *“I have a lot of, all my social stuff is now online, so my theatre group, we rehearse online, we have*  
384 *various support groups and stuff, so for me it would be very important to still be able to have that”*  
385 *(Participant 01, Black African, female).*

386 Essential requirements

387 Whilst all participants reported requiring only the basics, further detail regarding food, washing and  
388 cleaning facilities were needed:

389 *“I think a room with internet, and uh a bathroom and then just an understanding of how the uh meal*  
390 *system will work” (Participant 08, Indian, male).*

391 Food in particular was a key concern:

392 *“Um, to be able to cook my own food, for me food is very important to me, it is to everybody, but not*  
393 *everyone has the kind of attention to what they eat, I don’t eat meat, um, so um, you know, I eat fish*  
394 *but I, yeah I like to have my own space to cook my food” (Participant 01, Black African, female).*

395 Indeed, there were reports of food related complaints from other locations within which this system is  
396 widely implemented:

397 *“Well in the beginning they [residents in isolation facilities in [country]] were really complaining*  
398 *about the food that they were getting in the centres... and yeah after one or three weeks, I mean, I*  
399 *guess maybe they changed the types of food they were getting” (Participant 07, Indian, female).*

400 Those who had experienced isolation outside the home described how they had had to work hard to  
401 ensure food and cooking facilities were available:



402 *“He had local chip shops offering to cook him food, especially in the early days when we didn’t really*  
403 *know, we hadn’t really found our routine, so like the local fish and chip shop were feeding him, to be*  
404 *fair the people who run the hotel were feeding him, because they live on site, he had work colleagues*  
405 *bringing him plates of food, people dropping him food off, and then we kind of found routine,*  
406 *somebody gave him a microwave, somebody else gave him a fridge, somebody else gave him a*  
407 *toaster. It was a real community effort. Yeah after about 3 or 4 weeks he fell into a routine and he*  
408 *could cook himself stuff so it wasn’t so bad” (Participant 18, White, female).*

409 Those in temporary accommodation could also provide tangible support for vulnerable members of  
410 the family isolating at home:

411 *“So for that rocky stage when people were struggling [to secure priority slots], yeah I had a little*  
412 *servant on the outside” (Participant 18, White, female).*

413 Participants also described a need for outside space to maintain physical and emotional health:

414 *“I’d need to be able to get outside, to have, like here I have a garden here, so it’s just to be able to,*  
415 *you know, even when it’s raining I walk out to the garden just to get some air” (Participant 01, Black*  
416 *African, female)*

417 Indeed, outside space for physical activity was considered invaluable to those who had experienced  
418 isolation outside the home:

419 *“He runs. A lot. An awful lot. So yeah that is how he coped. Yeah, and like initially we thought it was*  
420 *going to be a lot harder the lockdown, so the first week he thought I’m just going to run when I can*  
421 *because we thought exercise was going to be stopped. So he kind of hit the 50 mile a week mark, and*  
422 *then it didn’t stop, so he just kept that up really. Just running every day” (Participant 18, White*  
423 *female).*

#### 424 Funding

425 Participants were concerned about costs associated with temporary accommodation. Participants were  
426 unable to cover the costs themselves, and the one participant who had experience of isolation outside  
427 the home described how her husband was only able to utilise accommodation because it was  
428 originally offered free of charge. Although the costs were later covered by the National Health

429 Service (NHS), she described how it would not have been possible to pay for accommodation without  
430 the goodwill of the community:

431 *“He was really lucky because I know a lot of NHS workers had to wait to move out because NHS*  
432 *trusts and health boards took a while to get their system working, but one of the local hotels, because*  
433 *we live in quite a small area, one of the local hotels offered free rooms, so he was actually able to*  
434 *move out straight away, on that very first Monday he was out. So, yeah. And the health board did pay*  
435 *in the end, but it was right at the end that they decided they were going to pay for it, but the hotel*  
436 *would have given him free room for like 10 weeks, 10, 11 weeks” (Participant 18, White, female).*

437 Despite the lifesaving potential of the scheme, many were unconvinced that it would be funded by the  
438 current government:

439 *“I mean, in all honesty I would be like incredibly surprised if um that was like, if this current*  
440 *government were offering that to people” (Participant 03, British Asian/ Pakistani).*

441 *“Yeah. So that is a very splendid idea if that was possible, but economically it’s not viable is it? It’s a*  
442 *good option but economically I don’t think this government would go for it anyway. But yeah it’s a*  
443 *very good system that if it was in place. Yeah.” (Participant 12, Asian, male).*

## 444 Discussion

### 445 Summary of findings

446 To our knowledge, this is the first study to have explored issues surrounding isolation outside the  
447 home in vulnerable households. This work reveals that the offer of accommodation outside the home  
448 to protect vulnerable households is viewed positively by many people who feel their household is at  
449 risk. Data collected from both survey and interview participants highlighted concerns regarding the  
450 spread of the virus within the household, and a need for solutions to prevent this. Interviews provided  
451 insight into populations who would be likely to accept and benefit from the offer; and it was  
452 suggested that those who are vulnerable, are likely to be exposed to the virus, and who are unable to  
453 isolate within the home would benefit most. Participants who met one or more of these criteria  
454 appeared very willing to accept the offer of accommodation compared with those who consider  
455 themselves or their household not to be vulnerable, were not employed in public facing occupations,

456 and/or had capacity to isolate within the home. Crucially, and in line with existing research (12), those  
457 from BAME and low income communities were considered to be more exposed and less able to  
458 isolate than those from high income backgrounds.

459 Participants questioned who should use temporary accommodation and at what stage, with legitimate  
460 concerns being raised regarding the utility of isolating outside the home once symptoms are present.

461 In locations in which accommodation has successfully been used to support self-isolation outside the  
462 home, it is often the symptomatic persons who are offered accommodation for isolation (19, 20). In  
463 the UK, NHS staff who are living with vulnerable family members have been offered accommodation  
464 to protect the family whilst allowing those not at high risk to continue to work (28). Our study  
465 suggests that both approaches could be feasible and acceptable to high risk audiences, but the offer of  
466 accommodation must be timely, and appropriate infection control measures must be in place.

467 Different households will have different requirements - there is no 'one size fits all'. However, as  
468 lockdown restrictions are lifted, and test, trace and isolate becomes a key strategy in controlling the  
469 virus, making support available to allow certain individuals to isolate safely could make a potentially  
470 valuable contribution to reducing transmission, morbidity and mortality.

#### 471 Implications of this study

472 This study revealed some important issues that would need to be addressed to ensure the acceptability  
473 and feasibility of any offer of accommodation for those who need it. Drawing together findings from  
474 the survey and interviews we consider below some of the options available, key concerns associated  
475 with isolating outside the home, and ways in which these may be mitigated.

476 In locations in which accommodation is provided to support isolation outside the home, it is the  
477 individual with the virus who would isolate outside the home in order to protect vulnerable household  
478 members (20). Participants were concerned that, by the time symptoms were evident, transmission of  
479 the virus to other household members would already have occurred. However, with a test, trace and  
480 isolate system firmly in place, it would be possible for those who have been in contact with virus to be  
481 offered accommodation to self-isolate before symptoms emerge. Indeed, individuals who are  
482 informed that they have been in contact with the virus may not be willing to return to their homes to

483 await test results if they are living with vulnerable relatives. The offer of accommodation for  
484 individuals in this situation could be highly effective.

485 A second option for isolation outside the home involves moving vulnerable people out of the home  
486 should household members become symptomatic. Although this was seen as a viable option, again,  
487 there were concerns that it would be too late to make use of temporary accommodation at the stage at  
488 which infected persons are showing symptoms. There is however, emerging evidence to suggest that  
489 viral load is associated with disease severity (29), and initial viral load is likely to be a contributing  
490 factor (30). Interventions aiming to reduce exposure to the virus in the home have been successful  
491 (31, 32). However, it is not easy to avoid contact with infected individuals, and more needs to be done  
492 to support vulnerable people (33). In particular, vulnerable individuals living in large households may  
493 be at risk of exposure to a high viral load from multiple sources if support is not available. In such  
494 situations, offering accommodation to vulnerable individuals, with appropriate care and support,  
495 could substantially reduce their exposure to the virus.

496 Participants recognised the significant practical and emotional challenges associated with isolating  
497 outside the home, and it is critical that those who are isolating outside (and inside) the home are  
498 adequately supported. Both practical (e.g., food) and emotional support will be required, for example  
499 through community support networks, similar to those that were established at the start of the  
500 pandemic. Participants also raised critically important concerns about exposure to infection in  
501 temporary accommodation that must be addressed. Strategies must be put in place to ensure that those  
502 in temporary isolation are not exposed, or exposing others, to the virus.

503 There were concerns over who would fund accommodation, and indeed, it would not be cost effective  
504 to provide accommodation for all populations. However, we suggest that offering accommodation in a  
505 targeted way to those who are vulnerable, exposed to the virus, and/or unable to isolate safely within  
506 their home would reduce these costs, and could even lead to a potential reduction in healthcare costs if  
507 the number of vulnerable individuals exposed to the virus is reduced.

## 508 Limitations

509 The main limitation associated with this work is the extent to which the views of our sample are  
510 representative of the UK population. Our recruitment for phase one occurred via a mailing list of  
511 individuals who had previously used and provided feedback on a website aiming to reduce infection  
512 within the home. This is therefore likely to be a group of individuals who are highly motivated to  
513 engage in infection control behaviours and their views may not be representative of the wider  
514 population. However, those who took part in the interview phase of the study had not shown any prior  
515 interest in infection control practices. Whilst every effort was made to recruit a diverse sample of  
516 participants for interviews, our primary use of social media to recruit participants may have resulted  
517 in individuals with very relevant voices being excluded. For example, those from non-English  
518 speaking communities, those without internet access, and those without social media would have been  
519 missed. Despite attempts to recruit participants through existing networks with community group  
520 leaders, engagement through these networks was minimal and could not be pursued further due to the  
521 need for timely completion of this initial study.

522 The rapidly changing nature of the pandemic and government advice limits the interpretation of our  
523 findings. As perceptions of risk within and outside the home change, the acceptability of  
524 accommodation to support isolation outside the home may also shift. Our findings must be interpreted  
525 with this in mind.

## 526 Conclusions

527 Within-household transmission is likely to be a leading cause of morbidity and mortality as we move  
528 out of lockdown (31) and we present just some of the ways in which isolation outside the home may  
529 be viewed and utilised. We recognise the complexities associated with these options, and  
530 acknowledge that different households will require very different provisions. However, we suggest  
531 that offering accommodation to vulnerable households following a potential exposure to the virus, or  
532 during the early stages of an outbreak within the home could be acceptable and feasible.

533

534 **Declarations**

535 **Ethics approval and consent to participate**

536 Ethical approval for Phase 1 was provided by Southampton Research Ethics Committee (56445). All  
537 survey participants consented online to take part in the study.

538 Ethical approval for Phase 2 was provided by the NHS Health Research Authority London – Queen  
539 Square Research Ethics Committee (20/HRA/2549). All interview participants verbally consented to  
540 take part in the study.

541 **Consent for publication**

542 All participants provided verbal or written consent for data to be included in publications.

543 **Availability of data and materials**

544 The datasets used and/or analysed during the current study are available from the corresponding  
545 author on reasonable request.

546 **Competing interests**

547 None declared

548 **Funding**

549 This study was funded by the National Institute of Health Research (NIHR) Health Protection  
550 Research Unit in Behavioural Science and Evaluation at the University of Bristol, in partnership with  
551 Public Health England (PHE). The views expressed are those of the authors and not necessarily those  
552 of the NIHR, the Department of Health and Social Care, or PHE. The funders had no role in the  
553 design of the study, collection, analysis, and interpretation of the data, or in writing the manuscript.

554 **Authors' contributions**

555 Conceived the study: LY, SD, JH

556 Study design: LY, SD, JH

557 Analysed the data: SD, KM, RdG

558 Interpreted the data: All authors

559 Drafted the manuscript: SD

560 Reviewed the manuscript and approved content: All authors

561 Met authorship criteria: All authors

562 Acknowledgements

563 Lucy Yardley is an NIHR Senior Investigator and her research programme is partly supported by

564 NIHR Applied Research Collaboration (ARC)-West, NIHR Health Protection Research Unit (HPRU)

565 in Behavioural Science and Evaluation, and the NIHR Southampton Biomedical Research Centre

566 (BRC). Jeremy Horwood is partly supported by NIHR Applied Research Collaboration (ARC)-West,

567 and NIHR Health Protection Research Unit (HPRU) for Behavioural Science and Evaluation at the

568 University of Bristol. Rachel de Garang is a BME Engagement Worker for the Voice & Influence

569 Partnership at The Care Forum.

570

571

- 572 1. Wilder-Smith A, Freedman M. Isolation, quarantine, social distancing and community  
573 containment: pivotal role for old-style public health measures in the novel coronavirus (2019-nCoV)  
574 outbreak. *Journal of Travel Medicine*. 2020:1-4.
- 575 2. Pan A, Liu L, Wang C. Association of Public Health Interventions With the Epidemiology of  
576 the COVID-19 Outbreak in Wuhan, China. *JAMA*. 2020;323(19):1915-23.
- 577 3. Zhu Y, Wang C, Dong L, Xiao M. Home quarantine or centralised quarantine, which is more  
578 conducive to fighting COVID-19 pandemic. *Brain, Behaviour, and Immunity*. 2020;S0889-  
579 1591(20):30729-7.
- 580 4. Shen M, Peng Z, Guo Y, Rong L, Li Y, Xiao Y, et al. Assessing the effects of metropolitan-  
581 wide quarantine on the spread of COVID-19 in public spaces and households. *International journal of*  
582 *infectious diseases*. 2020;S1201-9712:30326-X.
- 583 5. Wang Z, Ma W, Zheng X, Wu G, Zhang R. Household transmission of SARS-CoV-2. *Journal*  
584 *of Infection*. 2020;81(1):179-82.
- 585 6. Sjodin H, Wilder-Smith A, Osman S, Farooq Z, Rocklov J. Only strict quarantine measures  
586 can curb the coronavirus disease (COVID-19) outbreak in Italy, 2020. *Euro Surveill*.  
587 2020;25(13):200280.
- 588 7. Mao Z, Wan R, He L, Hu Y, Chen W. The enlightenment from two cases of asymptomatic  
589 infection from SARS-CoV-2: Is it safe after 14 days of isolation? *International journal of infectious*  
590 *diseases*. 2020;95(174-5)
- 591 8. Wang Y, Tian H, Zhang L, Zhang M, Guo D, Wu W, et al. Reduction of secondary  
592 transmission of SARS-CoV-2 in households by face mask use, disinfection and social distancing: a  
593 cohort study in Beijing China. *BMJ Global Health*. 2020;5(5):e002794.
- 594 9. Atchison C, Bowman L, Vriten C, Redd R, Pristera P, Eaton J, et al. Perceptions and  
595 behavioural responses of the general public during the COVID-19 pandemic: A cross-sectional survey  
596 of UK adults. *medRxiv*. 2020; 04.01.20050039; doi: <https://doi.org/10.1101/2020.04.01.20050039>
- 597 10. Machida M, Nakamura I, Saito R, Nakaya T, Hanibuchi T, Takamiya T, et al. Adoption of  
598 personal protective measures by ordinary citizens during the COVID-19 outbreak in Japan.  
599 *International journal of infectious diseases*. 2020;94(139-144)



- 600 11. Bodas M, Peleg K. Self-isolation compliance in the COVID-19 era influenced by  
601 compensation: Findings from a recent survey in Israel. *Health Affairs*. 2020;39(6):936-41.
- 602 12. Public Health England. Understanding the impact of COVID-19 on BAME groups (2020)  
603 [https://www.gov.uk/government/publications/covid-19-understanding-the-impact-on-bame-](https://www.gov.uk/government/publications/covid-19-understanding-the-impact-on-bame-communities)  
604 [communities.](https://www.gov.uk/government/publications/covid-19-understanding-the-impact-on-bame-communities)
- 605 13. Niedzwiedz C, O'Donnell C, Jani B, Demou E, Ho F, Celis-Morales C, et al. Ethnic and  
606 socioeconomic differences in SARS-CoV-2 infection: prospective cohort study using UK Biobank.  
607 *BMC Medicine*. 2020;18(1):1-14.
- 608 14. Pan D, Sze S, Minhas J, Bangash M, Pareek N, Divall P, et al. The impact of ethnicity on  
609 clinical outcomes in COVID-19: A systematic review. *EClinicalMedicine*. 2020; Online First 100404.
- 610 15. Public Health England. Disparities in the risk of outcomes of COVID-19. 2020. Accessed  
611 [https://assets.publishing.service.gov.uk/government/uploads/system/uploads/attachment\\_data/file/892](https://assets.publishing.service.gov.uk/government/uploads/system/uploads/attachment_data/file/892085/disparities_review.pdf)  
612 [085/disparities\\_review.pdf](https://assets.publishing.service.gov.uk/government/uploads/system/uploads/attachment_data/file/892085/disparities_review.pdf)
- 613 16. Razaq A, Harrison D, Karunanithi S, Barr B, Asaria M, Routen A, et al. BAME COVID-19  
614 deaths - what do we know? Rapid data and evidence review. "Hidden in plain sight". 2020. Accessed  
615 [https://www.cebm.net/covid-19/bame-covid-19-deaths-what-do-we-know-rapid-data-evidence-](https://www.cebm.net/covid-19/bame-covid-19-deaths-what-do-we-know-rapid-data-evidence-review/)  
616 [review/](https://www.cebm.net/covid-19/bame-covid-19-deaths-what-do-we-know-rapid-data-evidence-review/)
- 617 17. Bhala N, Curr G, Martineau A, Agyemang C, Bhopal R. Sharpening the global focus on  
618 ethnicity and race in the time of COVID-19. *The Lancet*. 2020;395(10238):1673-6.
- 619 18. Yang M, Hung P, Wu Y, Peng M, Chao Y, Su W. A three generation family cluster with  
620 COVID-19 infection: Should quarantine be prolonged? *Public Health*. 2020;S0033-3506(20):30205-5.
- 621 19. Chen S, Zhang Z, Yang J, Wang J, Zhai X, Barnighausen T, et al. Fangcang shelter hospitals:  
622 a novel concept for responding to public health emergencies. *The Lancet Health Policy*.  
623 2020;395:1305-14.
- 624 20. COVID-19 Health System Response Monitor. Cross Country Analysis. How do measures for  
625 isolation, quarantine and contact tracing differ among countries? 2020 [Available from:  
626 [https://analysis.covid19healthsystem.org/index.php/2020/05/19/how-do-measures-for-isolation-](https://analysis.covid19healthsystem.org/index.php/2020/05/19/how-do-measures-for-isolation-quarantine-and-contact-tracing-differ-among-countries/)  
627 [quarantine-and-contact-tracing-differ-among-countries/.](https://analysis.covid19healthsystem.org/index.php/2020/05/19/how-do-measures-for-isolation-quarantine-and-contact-tracing-differ-among-countries/)

- 628 21. Estrin D, Warner G. "Everybody's getting along here": How Hotel Corona united Israelis and  
629 Palestinians. NPR. 2020. Accessed from [https://www.npr.org/2020/06/09/860182244/everybodys-  
631 getting-along-here-how-hotel-corona-united-israelis-and-palestinians](https://www.npr.org/2020/06/09/860182244/everybodys-<br/>630 getting-along-here-how-hotel-corona-united-israelis-and-palestinians)
- 632 22. Walker V. Need to self-isolate? These hotels are offering "quarantine packages". 2020.  
633 Accessed from <https://thepointsguy.co.uk/news/hotel-quarantine-packages-coronavirus/>
- 634 23. Wira N. Hotels, apartments offer sanctuary for self-isolation. The Jakarta Post 2020.  
635 Accessed from [https://www.thejakartapost.com/life/2020/04/03/hotels-apartments-offer-sanctuary-  
637 for-self-isolation.html](https://www.thejakartapost.com/life/2020/04/03/hotels-apartments-offer-sanctuary-<br/>636 for-self-isolation.html)
- 638 24. Vaismoradi M, Jones J, Turunen H, Snelgrove S. Theme development in qualitative content  
639 analysis and thematic analysis Journal of Nursing Education and Practice. 2016;6:100.
- 640 25. Vaismoradi M, Turunen H, Bondas T. Content analysis and thematic analysis: implications  
641 for conducting a qualitative descriptive study. Nursing Health Science. 2013;15:398-405.
- 642 26. Malterud K, Siersma V, Guassora A. Sample Size in qualitative interview studies: guided by  
643 information power. Qualitative Health Research. 2016;26(13):1753-60.
- 644 27. Green J, Thorogood N. Qualitative methods for health research 2nd edition ed. London Sage  
645 Publications; 2004.
- 646 28. National Health Service. NHS Staff - hotel accomodation. 2020. Accessed from  
647 [https://www.england.nhs.uk/coronavirus/wp-content/uploads/sites/52/2020/03/hotel-accommodation-  
649 for-nhs-staff-20-march-2020.pdf](https://www.england.nhs.uk/coronavirus/wp-content/uploads/sites/52/2020/03/hotel-accommodation-<br/>648 for-nhs-staff-20-march-2020.pdf)
- 650 29. Pujadas E, Chaudhry F, McBride R, Richter F, Zaho S, Wajnberg A, et al. SARS-COV-2  
651 viral load predicts COVID-19 mortality. The Lancet Respiratory Medicine. 2020.  
652 [https://doi.org/10.1016/S2213-2600\(20\)30354-4](https://doi.org/10.1016/S2213-2600(20)30354-4)
- 653 30. Xu TC, C, Zhu Z. Clinical features and dynamics of viral load in imported and non imported  
654 patients with COVID-19. International journal of infectious diseases. 2020;94(68-71; Epub ahead of  
655 print).
- 656 31. Little P, Read R, Amlot R, Chadborn T, Rice C, Bostock J. Reducing risks from coronavirus  
657 transmission in the home- the role of viral load. BMJ [Internet]. 2020;269; Available from:  
658 <https://www.bmj.com/content/369/bmj.m172>.

656 32. Yardley L, Miller S, Schlotz WL, P. Evaluation of a web-based intervention to promote hand  
657 hygiene: exploratory randomised controlled trial. Journal of medical internet research.  
658 2011;13(4:e107).

659 33. Ainsworth B, Miller S, Denison-Day J, Stuart B, Groot J, Rice C, et al. Current infection  
660 control behaviour patterns in the UK, and how they can be improved by "Germ Defence", an online  
661 behavioural intervention to reduce the spread of COVID-19 in the home. medRxiv.  
662 2020;<https://doi.org/10.1101/2020.06.22.20137406>.

663

664

665 Table 1: Participant characteristics

|                                             | Phase 1 (N=110) | Phase 2 (N=19) |
|---------------------------------------------|-----------------|----------------|
| <b>Age</b>                                  |                 |                |
| 18-25                                       | 0               | 2              |
| 26-40                                       | 2               | 8              |
| 41-60                                       | 35              | 8              |
| 61-70                                       | 41              | 1              |
| Over 70                                     | 30              | 0              |
| Missing                                     | 2               | 0              |
| <b>Gender</b>                               |                 |                |
| Male                                        | Missing         | 7              |
| Female                                      | Missing         | 12             |
| <b>Ethnic group</b>                         |                 |                |
| White                                       | 104             | 6              |
| Mixed / multiple ethnic groups              | 1               | 1              |
| Asian / Asian British                       | 0               | 9              |
| Black / African / Caribbean / Black British | 1               | 3              |
| Missing                                     | 4               | 0              |
| <b>Leaving full time education</b>          |                 |                |
| Before finishing school                     | 1               | 1              |
| After finishing school                      | 42              | 4              |
| After finishing university                  | 36              | 4              |
| After postgraduate studies                  | 28              | 1              |
| Missing                                     | 3               | 9              |
| <b>Experience with COVID-19</b>             |                 |                |
| I am at increased risk                      | 48              | 1              |
| I live with someone high risk               | 19              | 7              |

|                                       |    |    |
|---------------------------------------|----|----|
| I have had the virus                  | 7  | 1  |
| I live with someone who had the virus | 1  | 0  |
| None of the above                     | 32 | 10 |
| Missing                               | 3  | 0  |

666

667

Table 2: Facilitators and barriers to the uptake of accommodation for isolation – results of the content analysis of survey text

|                                                                    | <b>Description</b>                                                                           | <b>Example quote</b>                                                                                                              | <b>N</b> |
|--------------------------------------------------------------------|----------------------------------------------------------------------------------------------|-----------------------------------------------------------------------------------------------------------------------------------|----------|
| <b>Facilitators</b>                                                |                                                                                              |                                                                                                                                   |          |
| To protect others in my household/if someone at home was high risk | Includes both actual and hypothetical comments about having someone at high risk at home.    | <i>If it was a case of protecting my wife, I would probably leave like a shot if it was to her advantage.</i>                     | 25       |
| To control the virus                                               | Includes broader social sense of doing the right thing.                                      | <i>I would be motivated by the compulsion to save others.</i>                                                                     | 5        |
| To avoid using shared areas                                        | To avoid needing to use shared rooms in the home                                             | <i>I live in a big enough house to keep apart, but only one bathroom, so because of shared shower facility might go elsewhere</i> | 1        |
| <b>Barriers</b>                                                    |                                                                                              |                                                                                                                                   |          |
| Can self-isolate where I am                                        | Includes having enough space to self-isolate at home, or living alone                        | <i>We live in the countryside and we are able to self-isolate</i>                                                                 | 28       |
| Not wanting to be apart from family                                | Unwilling to be away from family                                                             | <i>I doubt if we could manage apart from each other we are so interdependent on each other.</i>                                   | 10       |
| Caring for others                                                  | Having caring responsibilities at home, including children, spouse, parent or pets. Excludes | <i>Someone who is dependant on me. I would not be able to support them in any way if I were somewhere else.</i>                   | 4        |

|                                                                                  |                                                                                                                 |                                                                                                                                                                  |   |
|----------------------------------------------------------------------------------|-----------------------------------------------------------------------------------------------------------------|------------------------------------------------------------------------------------------------------------------------------------------------------------------|---|
|                                                                                  | comments where alternative caring options were considered (see below).                                          |                                                                                                                                                                  |   |
| Concerns about implications of isolation for mental well-being and relationships | Worried about negative impact on mental well-being, including loneliness and boredom, or missing family members | <i>Self-isolating can be lonely without contact with other people but doing it in your own home is more comforting with your own things around you</i>           | 4 |
| Upheaval of moving when ill/want to be in own home when ill                      | Preference for being at home when feeling ill                                                                   | <i>Would be better for others to be removed and leave sick person in familiar surroundings</i>                                                                   | 4 |
| Perceived risk from others in the building                                       | Concerned about risk of catching the virus from others in self-isolation accommodation                          | <i>Definitely would not accept accommodation situated in a building designated for multi occupancy or in an area with higher numbers of fatalities or cases.</i> | 2 |
| Unfeasible for unspecified reasons                                               | Self-isolation elsewhere is perceived as unfeasible but no reason is given as to why                            | <i>There are no circumstances in which I could feasibly self-isolate away from home.</i>                                                                         | 3 |
| <b>Dependent on:</b>                                                             |                                                                                                                 |                                                                                                                                                                  |   |

|                                                   |                                                                                                                                      |                                                                                                                                                                                                     |    |
|---------------------------------------------------|--------------------------------------------------------------------------------------------------------------------------------------|-----------------------------------------------------------------------------------------------------------------------------------------------------------------------------------------------------|----|
| Location of accommodation                         | Location of accommodation, focused on proximity to home to allow the person both to receive and provide care to those still at home. | <i>it would need to be relatively close by so that, should my son need care, I could return home as I would not want him to be on his own if he became ill and we have no other support nearby.</i> | 22 |
| Facilities available/suitability of accommodation | Includes requirements for accommodation e.g. comfort, outside space.                                                                 | <i>Would depend on the quality of the facility - I would not like it to be Spartan, uncomfortable, with poor Wi-Fi, nowhere near a good hospital</i>                                                | 11 |
| Support provided for those left at home           | Includes considerations about what support would be provided for children, spouses or parents they care for                          | <i>It would depend on whether someone else who was not ill would be available to look after my son</i>                                                                                              | 9  |
| Medical care available at accommodation           | Consideration of medical care available and who could look after them, either due to Covid-19 or due to other health conditions.     | <i>I would isolate elsewhere especially if a close watch in a nursing capacity was available for me and other isolation participants</i>                                                            | 7  |
| Access to Wi-Fi                                   | Needing Wi-Fi for staying in touch with people, or running business                                                                  | <i>I would want to be able to use my PC, phone and tablet.</i>                                                                                                                                      | 6  |
| Hygiene and cleanliness of accommodation          | Concerned about germs in the self-isolation accommodation                                                                            | <i>I am more confident in the cleaning regime I have at my own home than trusting it to someone else. I would not be comfortable</i>                                                                | 5  |



|                                                             |                                                                                                                         |                                                                                                                                                                                                                                                                                                                                        |   |
|-------------------------------------------------------------|-------------------------------------------------------------------------------------------------------------------------|----------------------------------------------------------------------------------------------------------------------------------------------------------------------------------------------------------------------------------------------------------------------------------------------------------------------------------------|---|
|                                                             |                                                                                                                         | <i>living anywhere that I hadn't cleaned myself to my own high standards.</i>                                                                                                                                                                                                                                                          |   |
| Special dietary needs being met/access to food              | Unsure about how and what food would be provided                                                                        | <i>I would also want vegetarian food, or ability to get vegetarian (ideally vegan) food.</i>                                                                                                                                                                                                                                           | 4 |
| Taking my pet with me                                       | Wanting to take a pet into self-isolation accommodation                                                                 | <i>Whether I could take my dog with me</i>                                                                                                                                                                                                                                                                                             | 1 |
| How much fun it would be                                    | Considering how much fun it would be                                                                                    | <i>Where it was, what facilities were available, whether I'd be able to get food, and how much fun it would be.</i>                                                                                                                                                                                                                    | 1 |
| Whether I have confirmed Covid-19 or just possible exposure | Considering how necessary it is to self-isolate depending on whether a confirmed diagnosis of the virus has been given. | <i>If I had been given a positive CV19 test result and was being asked to isolate remotely to protect my family, I would do so. I would not, however, go into precautionary remote self-isolation in a setting where CV19 was known to be present in other residents simply on the basis of suspected contact with a CV19 carrier.</i> | 1 |
